# Supplementary material for: Effect of prehabilitation in gastro-oesophageal adenocarcinoma: study protocol of a multicentric, randomised, control trial—the PREHAB study
Source: PubMed Central journal article supplement — BMJ Open. 2016 Dec 7;6(12):e012876. doi: 10.1136/bmjopen-2016-012876 (PMC5168676; doi:10.1136/bmjopen-2016-012876), 2016-12-07
Supplement: bmjopen-2016-012876supp_appendices.pdf [file bmjopen-2016-012876supp_appendices.pdf]

## Appendice 1

### FORMULAIRE D'INFORMATION

**Etude pilote, randomisée, multicentrique sur l'effet de la préhabilitation dans le cancer de l'estomac et de l'œsophage**

**Promoteur de l'essai :**

CHU de Clermont Ferrand,  
58 rue Montalembert,  
63003 Clermont Ferrand Cedex 1, France  
Code promoteur : **PHRC IR 2015 LE ROY**

**Investigateur coordonnateur :**

Docteur Bertrand Le Roy  
Service de chirurgie digestive et hépato-biliaire  
1 Place Lucie Aubrac  
63003 Clermont-Ferrand

Madame, Monsieur, il vous est proposé de participer à un protocole de recherche clinique, dont le but est de montrer qu'on peut améliorer votre récupération post opératoire et optimiser la poursuite de votre traitement de chimiothérapie en vous préparant physiquement, psychologiquement et le plan nutritionnel avant l'intervention. Cette prise en charge est appelée « préhabilitation » et va vous être expliquée ci-après plus en détails.

Cependant avant de décider de prendre part à cette étude biomédicale, il est important que vous preniez le temps de lire et de comprendre les informations suivantes concernant le déroulement de ce protocole. Cette note d'information décrit l'objectif, les procédures, les bénéfices et les risques de l'étude. Elle explique entre autre votre droit à vous retirer de l'étude à tout moment sans avoir à vous justifier. S'il y a quoi que ce soit dans ce document que vous ne comprenez pas, veuillez demander à votre médecin ("investigateur") ou au personnel de l'étude de vous l'expliquer. Prenez votre temps pour décider si vous souhaitez ou non participer à cette étude ; parlez-en avec vos amis ou vos proches. Si vous choisissez de participer, il vous sera demandé de signer un document intitulé « Formulaire de consentement » et ce en 2 exemplaires, dont un vous sera remis. Si vous refusez de prendre part à l'étude, ceci n'aura aucune conséquence sur votre prise en charge médicale.

Pour pouvoir participer à cette étude vous devez être couvert par un régime de Sécurité Sociale.

#### **Rationnel de l'étude**

Vous allez être opéré de votre cancer œsogastrique dans le service de chirurgie de votre CHU.

Comme toute intervention chirurgicale, elle comporte des risques propres à chaque type d'intervention.

Ces risques peuvent induire une augmentation de votre durée d'hospitalisation, une diminution plus ou moins longue de votre qualité de vie voire une impossibilité à poursuivre votre traitement de chimiothérapie.

Récemment des chirurgiens ont montré qu'une préparation durant 6 semaines avant l'opération, pouvait améliorer les résultats post-opératoires sur la morbidité globale, le statut nutritionnel, le retour plus rapide aux activités quotidiennes permettant, en outre, de réaliser tout le protocole de chimiothérapie prévu initialement. Cette prise en charge est appelée « préhabilitation ». Elle repose sur 3 volets.

- une prise en charge physique qui consiste à réaliser des exercices cardiovasculaires 3 fois par semaine sous surveillance médicale dans le service de médecine du sport et de réadaptation de votre hôpital

**Paraphe du patient**

- une prise en charge nutritionnelle qui consiste à établir avec un médecin nutritionniste et un diététicien, un programme alimentaire pouvant conduire à une supplémentation nutritionnelle si nécessaire
- une prise en charge psychologique avec le soutien d'un psychologue qui vous recommandera, en outre, des tests de relaxation à réaliser à la maison.

Ce protocole a déjà montré son intérêt dans le domaine de la chirurgie cardio vasculaire ou du cancer colorectal. Aussi, nous souhaiterions en faire de même pour la chirurgie du cancer œsogastrique d'où l'étude à laquelle nous vous proposons de participer.

**Déroulement de l'étude :**

Après information par votre chirurgien et après lecture de cette note, si vous acceptez de rentrer dans l'étude, un bilan pré-opératoire standard pour votre pathologie pourra être réalisé si nécessaire. De même vous pourrez être amené à voir ou revoir un anesthésiste à la demande du chirurgien.

Nous vous demanderons également de bien vouloir compléter, répondre à quelques questionnaires évaluant votre qualité de vie, vos habitudes alimentaires, vos activités quotidiennes...

Après ces évaluations et si vous répondez toujours aux critères du protocole, un tirage au sort sera réalisé afin de déterminer dans quel groupe vous allez entrer durant vos séances de chimiothérapie pré opératoire 1) groupe contrôle : préparation standard selon les référentiels actuels, 2) groupe préhabilitation.

**Paraphe du patient**

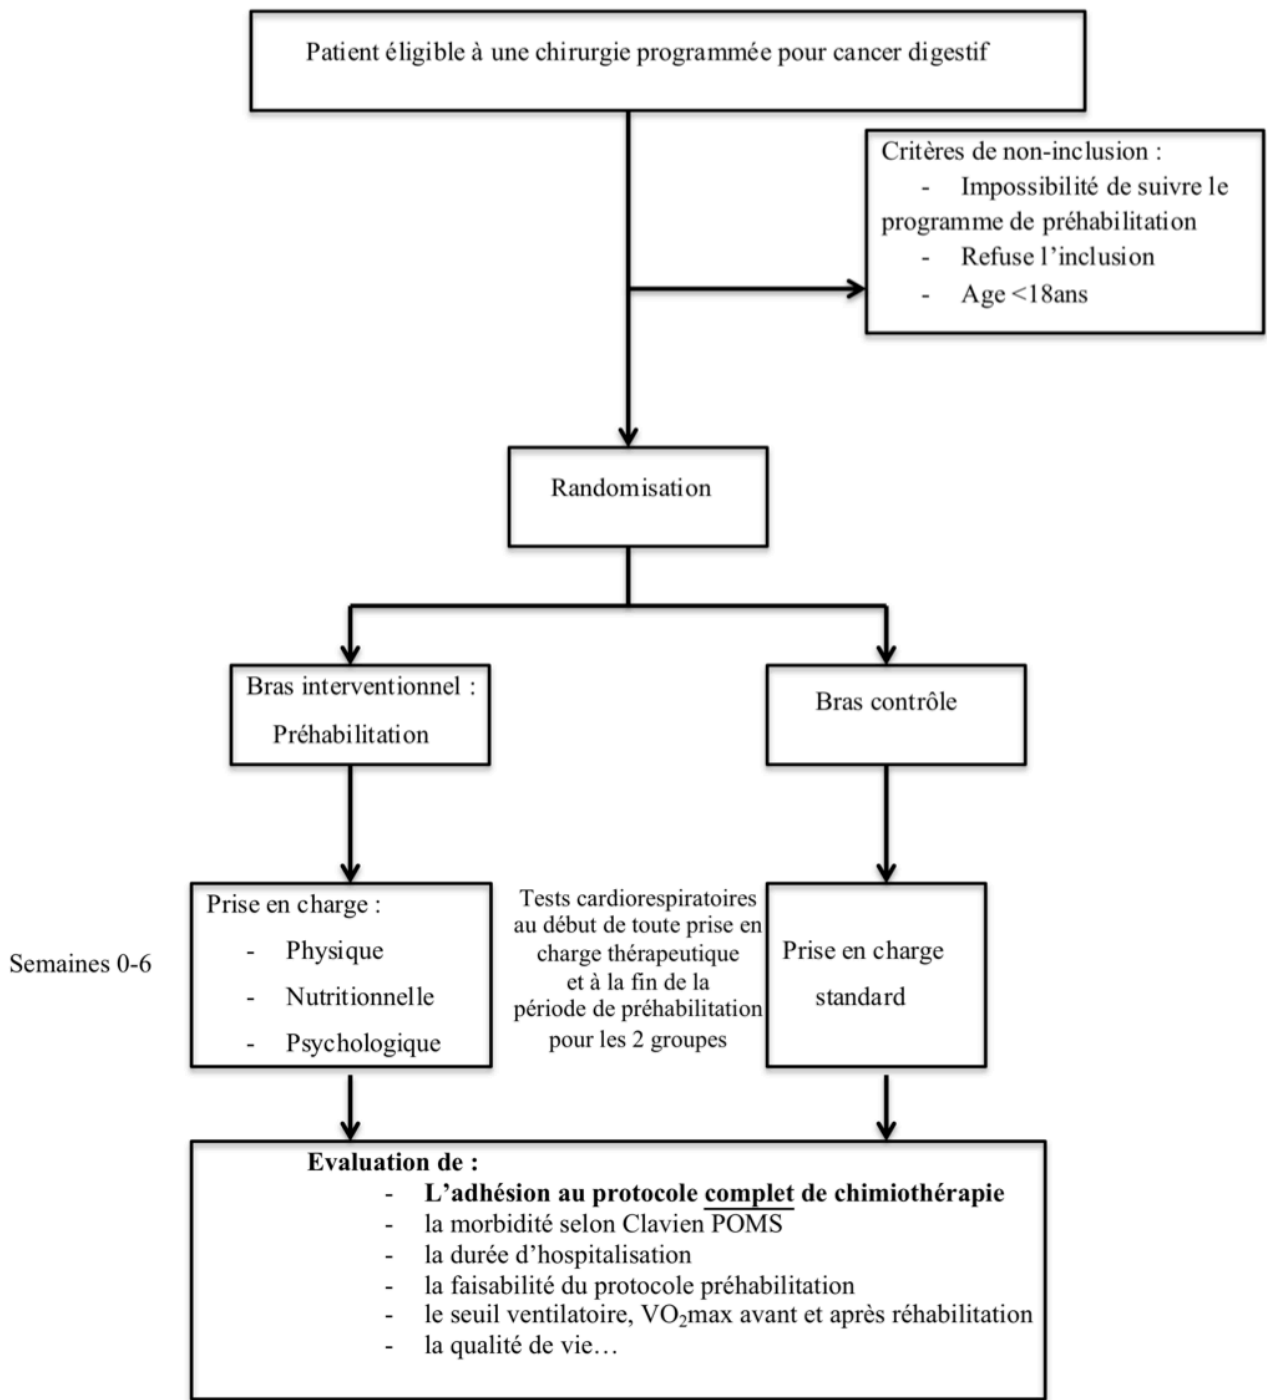

Paraphe du patient

***La préparation standard consistera :***

- a) à bénéficier de séance de kinésithérapie respiratoire si nécessaire,
- b) à prendre des compléments alimentaires si nécessaire soit par voie orale, soit à l'aide de sonde nasogastrique (sonde qui passe par les narines pour aller directement dans le tube digestif) soit par injection.
- c) à évaluer votre anxiété à l'aide de questionnaires

***La "préhabilitation" consistera :***

- a) à réaliser des exercices physiques à raison de 1h, 3 fois par semaine durant 6 semaines dans le service de médecine du sport de votre Hôpital et ce, sous la surveillance médicale d'un kinésithérapeute. Ces activités seront adaptées à vos propres capacités et selon vos résultats aux examens cardio respiratoires réalisés au préalable avant tout traitement. Ils débuteront 2 mois avant votre chirurgie.

Les exercices réalisés seront de 2 types :

- \* des exercices d'endurance dont le but sont d'améliorer votre résistance cardio vasculaire en réalisant du vélo et/ou de la marche,
- \* des exercices de renforcement musculaires (bras, épaules, poitrine, abdomen, dos hanches et jambe) à l'aide de matériel type haltères, élastiques .....

Tous ces exercices seront actualisés au cours du temps en fonction de vos progrès, performances.

- b) à suivre un programme nutritionnel élaboré avec un nutritionniste 2 mois avant votre chirurgie. Ce dernier sera établi en fonction de vos besoins, de vos habitudes alimentaires et pourra être adapté, modifié en cours du programme avec l'aide du diététicien qui vous rencontrera régulièrement lors de vos

venues à l'hôpital pour vos séances de chimiothérapie. Vous reverrez également le nutritionniste à la fin de vos 6 semaines de préhabilitation.

- c) à vous rendre à des consultations de psychologies pour apprendre à gérer, contrôler votre anxiété, à mieux appréhender votre traitement de chimiothérapie et les effets secondaires associés. Pour cela il vous sera demandé d'assister à 3 consultations d'1h avec un psychologue qui vous apprendra des exercices de relaxations à réaliser ensuite à votre domicile. Ces consultations auront lieu au cours des 2 mois précédents votre chirurgie

A la fin de vos séances de chimiothérapie, vous bénéficierez à nouveaux de bilans (et ce, peu importe dans quel groupe vous êtes inclus) afin de faire le point sur :

- 1) votre résistance cardiorespiratoire
- 2) votre état nutritionnel,
- 3) votre niveau d'anxiété

De même il vous sera demandé de répondre à des questionnaires

Ensuite, un suivi médical 1 mois puis à la fin de votre traitement de chimiothérapie adjuvante sera réalisé par le biais d'une consultation afin d'évaluer les suites opératoires, votre qualité de vie, votre autonomie. Le déroulement de chaque consultation comprendra un examen médical clinique, des questionnaires spécifiques à l'étude à compléter.

**Paraphe du patient**

## **Bénéfices et risques de l'étude**

Les bénéfices potentiels pour vous de participer à cette étude pourraient être une meilleure récupération post opératoire, une durée d'hospitalisation plus courte et surtout un retour plus rapide à vos activités du quotidien, et peut être une meilleure tolérance de la chimiothérapie.

Ce projet ne devrait pas engendrer de risque supplémentaire pour vous si ce n'est peut être un surplus de fatigue liée aux exercices, examens et consultations supplémentaires requis par l'essai, voire des contraintes supplémentaires comme disponibilités, déplacements, suivi alimentaire .

## **Modalité de recrutement**

Ce protocole sera proposé à 120 patients répondant aux critères d'inclusion et d'exclusion. Ces 120 patients seront inclus après signature du consentement éclairé.

## **Traitements administrés dans le cadre de cette étude**

Aucun traitement supplémentaire autre que ceux utilisés en routine pour votre prise en charge thérapeutique ne sera nécessaire à la conduite de cette étude.

## **Evaluations réalisées**

Nous essayerons au mieux de concilier les examens, consultations spécifiques au protocole avec vos venues au CHU dans le cadre de votre traitement de chimiothérapie. Si des visites supplémentaires s'avéraient nécessaires pour des questions de disponibilités, d'organisation de services sachez que cela n'induit aucun frais supplémentaire pour vous.

De même lors de votre prise en charge, suivi, il vous sera remis des questionnaires permettant d'évaluer votre qualité de vie, votre niveau d'anxiété ou encore votre statut physique et nutritionnel. Ces questionnaires devront être remplis sur place et prendront au maximum une vingtaine de minutes.

## **Durée totale de votre participation à ce protocole**

La durée totale de votre participation à cette étude sera de 6 mois.

## **Indemnisation**

Il n'y aura aucune indemnisation dans le cadre de cette étude.

## **Période d'exclusion**

La période d'exclusion définie dans le cadre de cette étude est de 15 jours avant votre inclusion jusqu'à votre sortie d'étude, période pendant laquelle vous ne pourrez pas participer à un autre protocole de recherche clinique.

**Paraphe du patient**

## **Conservation de matériel biologique**

Cette étude ne fera l'objet d'aucune conservation de matériel biologique

## **Protection des patients et confidentialité**

Cette recherche a reçu l'avis favorable du Comité de Protection des Personnes sud est VI le ..... ainsi que l'autorisation préalable de l'autorité compétente de santé datée du ..... Il est possible que cette recherche soit interrompue, si les circonstances le nécessitent, par le promoteur ou à la demande de l'autorité de santé.

Votre participation à cette recherche biomédicale n'engendrera pour vous aucun frais supplémentaire par rapport à ceux que vous auriez dans le cadre de la prise en charge standard de votre maladie.

Toutefois, pour pouvoir participer à cette recherche vous devez être affilié(e) ou bénéficier d'un régime de sécurité sociale.

*Le CHU de Clermont-Ferrand, qui organise cette recherche biomédicale en qualité de promoteur, a contracté une assurance conformément aux dispositions législatives, garantissant sa responsabilité civile et celle de tout intervenant auprès de la Société Hospitalière d'Assurances Mutuelles (SHAM, contrat n° 147161). Dans le cas où votre état de santé serait altéré du fait de votre participation à l'étude, conformément à la loi de Santé Publique n°2004-806 du 9 août 2004, vous seriez en droit de recevoir des dédommagements dans le cadre de ce contrat d'assurance spécifique.*

Dans le cadre de la recherche biomédicale à laquelle le CHU de Clermont-Ferrand (établissement promoteur) vous propose de participer, un traitement informatique de vos données personnelles va être mis en œuvre pour permettre d'analyser les résultats de la recherche au regard de l'objectif de cette dernière qui vous a été présenté. A cette fin, les données médicales vous concernant et les données relatives à vos habitudes de vie, seront transmises au Promoteur de la recherche ou aux personnes ou sociétés agissant pour son compte, en France ou à l'étranger. Ces données seront identifiées par un numéro de code et par vos initiales. Ces données pourront également, dans des conditions assurant leur confidentialité, être transmises aux autorités de santé françaises, à d'autres entités du CHU de Clermont Ferrand (établissement promoteur).

Conformément aux dispositions de loi relative à l'informatique aux fichiers et aux libertés, vous disposez d'un droit d'accès et de rectification. Vous disposez également d'un droit d'opposition à la transmission des données couvertes par le secret professionnel susceptibles d'être utilisées dans le cadre de cette recherche et d'être traitées.

Vous pouvez également accéder directement ou par l'intermédiaire d'un médecin de votre choix à l'ensemble de vos données médicales en application des dispositions de l'article L. 1111-7 du code de la santé publique. Ces droits s'exercent auprès du médecin qui vous suit dans le cadre de la recherche et qui connaît votre identité.

Par ailleurs, vous pourrez être tenu informé des résultats globaux de cette recherche à la fin de l'étude.

Vous êtes libre d'accepter ou de refuser de participer à cette recherche. De plus vous pouvez exercer à tout moment votre droit de retrait de cette recherche sans avoir à vous justifier. Le fait de ne plus participer à cette recherche ne modifiera pas la qualité des soins qui vous sont prodigués. Vous pouvez demander à tout moment des explications complémentaires sur l'étude à l'équipe soignante.

Lorsque vous aurez lu cette note d'information et obtenu les réponses aux questions que vous vous posez en interrogeant le médecin investigateur, il vous sera proposé, si vous en êtes d'accord,

**Paraphe du patient**

de donner votre consentement écrit en signant le document préparé à cet effet en accord avec le code de la santé publique visant à protéger les personnes se soumettant à une étude biomédicale. Votre consentement écrit n'enlève en aucun cas la responsabilité des médecins qui vous soignent

**A qui devez-vous vous adresser en cas de questions ou de problèmes ?**

En cas de problèmes, d'événements indésirables en cours d'essai ou de questions, vous pouvez vous adresser aux personnes suivantes :

| Vos contacts dans l'étude                                                                                                                                 |                                                                                       |                                                                                                                                               |
|-----------------------------------------------------------------------------------------------------------------------------------------------------------|---------------------------------------------------------------------------------------|-----------------------------------------------------------------------------------------------------------------------------------------------|
| <b>Bertrand Le Roy (Coordonnateur)</b>                                                                                                                    |                                                                                       |                                                                                                                                               |
| Service de Chirurgie Digestive<br>1 place Lucie et Raymond Aubrac<br>Tel: 04 73 75 04 94<br><a href="mailto:clermontferrand.fr">clermontferrand.fr</a>    | Hôpital Estaing<br>Fax : 04 73 75 19 22                                               | CHU de Clermont-Ferrand<br>63003 Clermont-Ferrand cedex 1<br><a href="mailto:bleroy@chu-clermontferrand.fr">bleroy@chu-clermontferrand.fr</a> |
| <b>Brigitte Gillet (Ingénieur Hospitalier, Attaché de recherche clinique)</b>                                                                             |                                                                                       |                                                                                                                                               |
| Service de Chirurgie Digestive<br>CHU de Clermont-Ferrand<br>63003 Clermont-Ferrand cedex 1<br><a href="mailto:clermontferrand.fr">clermontferrand.fr</a> | Unité d'Oncologie Digestive<br>1 place Lucie et Raymond Aubrac<br>Tel: 04 73 75 52 26 | Hôpital Estaing<br>Fax : 04 73 75 19 22<br><a href="mailto:bgillet@chu-clermontferrand.fr">bgillet@chu-clermontferrand.fr</a>                 |

Paraphe du patient sur toutes les pages

Date : ...../...../.....

**Signature du patient**  
(Précédée de la mention « Lu et compris »)

**Paraphe de l'investigateur**

## Appendice 2

### FORMULAIRE DE CONSENTEMENT DE PARTICIPATION A UNE RECHERCHE BIOMEDICALE

#### Etude pilote, randomisée, multicentrique sur l'effet de la préhabilitation dans le cancer de l'oesophage et de l'estomac

**Promoteur de l'essai :**

CHU de Clermont Ferrand,  
58 rue Montalembert,  
63003 Clermont Ferrand Cedex 1, France  
Code promoteur : **PHRC IR 2015 LE ROY**

**Investigateur coordonnateur :**

Docteur Bertrand Le Roy  
Service de chirurgie digestive et hépato-biliaire  
1 Place Lucie Aubrac  
63003 Clermont-Ferrand

Je soussigné(e)

M<sup>me</sup>, M<sup>lle</sup>, M. (*rayez les mentions inutiles*) (*nom, prénom*).....

Né(e) le .....

Déclare :

- que le Docteur (*nom, prénom, téléphone*) ..... m'a proposé de participer à l'étude sus nommée,
- qu'il m'a expliqué en détail le protocole,
- qu'il m'a notamment fait connaître :
  - l'objectif, la méthode et la durée de l'étude
  - les contraintes et les risques potentiels encourus
  - mon droit de refuser de participer et en cas de désaccord de retirer mon consentement à tout moment
  - mon obligation d'inscription à un régime de sécurité sociale
  - que, si je le souhaite, à son terme, je serais informé(e) par le médecin investigateur de ses résultats globaux
  - que je ne serais pas autorisé(e) à participer à d'autres études cliniques durant toute ma participation à ce protocole estimée à 6 mois maximum.
  - que le Comité de Protection des Personnes *Sud Est VI* a émis un avis favorable en date du *xx/xx/xxxx* (*Préciser le nom de CPP sollicité et la date d'obtention de l'avis favorable*)
  - que l'ANSM (Agence Nationale de Sécurité du Médicament et des produits de santé) a délivré une autorisation pour cette étude
  - que dans le cadre de cette étude le promoteur, le CHU de Clermont-Ferrand, a souscrit à une assurance couvrant cette recherche (contrat SHAM **147161**).
- que j'ai répondu en toute bonne foi aux questions concernant mon état de santé et ma participation à d'autres études.

Les informations relatives à l'étude recueillies par l'investigateur sont traitées confidentiellement. J'accepte que les données enregistrées à l'occasion de cette recherche puissent faire l'objet d'un traitement informatisé anonyme. J'ai bien noté que le droit d'accès prévu par la loi du 6 août 2004 relative à l'informatique, aux fichiers et aux libertés s'exerce à tout moment auprès du médecin qui me suit dans le cadre de la recherche et qui connaît mon identité. Je pourrai exercer mon droit de rectification et d'opposition auprès de ce même médecin, qui contactera le promoteur de la recherche



**Après avoir discuté librement et obtenu réponse à toutes mes questions, j'accepte librement et volontairement de participer à cette recherche biomédicale dans les conditions précisées dans le formulaire d'information et de consentement.**

**Nom et prénom du patient :**

.....

**Date :...../...../.....**

**Signature**

Précédée de la mention « Lu et compris » :

**Nom de l'investigateur :**

.....

**Date :...../...../.....**

**Signature :**

*Ce document est à réaliser en 2 exemplaires originaux, dont le premier doit être gardé 15 ans par l'investigateur, un autre remis à la personne donnant son consentement.*
